# Supplementary material
Source: PubMed Central journal article supplement (PMC4632186)
Supplement: NIHMS65361-supplement-Data_Supplement.pdf [file NIHMS65361-supplement-Data_Supplement.pdf]

**Online supplement**

**ETHNIC DIFFERENCES IN ASSOCIATIONS BETWEEN BLOOD PRESSURE AND  
STROKE IN SOUTH ASIAN AND EUROPEAN MEN**

**Running title:** BP and stroke in South Asians and Europeans

**Authors:** Sophie V Eastwood MSc<sup>1</sup>, Therese Tillin MSc<sup>1</sup>, Nish Chaturvedi MD<sup>1</sup>, Alun D Hughes PhD<sup>1</sup>

**Affiliations:** <sup>1</sup>UCL Institute of Cardiovascular Science, University College London, Gower Street, London, United Kingdom, WC1E 6BT.

**Corresponding author:** Dr Sophie V Eastwood, UCL Institute of Cardiovascular Science, UCL, Gower Street, London, United Kingdom, WC1E 6BT. Email:

[sophie.eastwood@ucl.ac.uk](mailto:sophie.eastwood@ucl.ac.uk), Tel: +44 (0)207 679 9434.

**Table S1. Hypertension control at follow-up clinic (2008-2011) in European and South Asian men.** SBP=systolic blood pressure, DBP= diastolic blood pressure. Data are n(%) or mean±SD. \*Diabetes vs. no diabetes p<0·05, †p value for ethnic difference in all participants, ‡p value for ethnic difference in those without diabetes, §p value for ethnic difference in those with diabetes.

| BP treatment/<br>measure        | Europeans |             |          | South Asians |             |          | p†     | p‡     | p§   |
|---------------------------------|-----------|-------------|----------|--------------|-------------|----------|--------|--------|------|
|                                 | All       | No diabetes | Diabetes | All          | No diabetes | Diabetes |        |        |      |
| On anti-hypertensive medication | 299(56)   | 212(50)     | 87(84)*  | 347(78)      | 174(70)     | 173(89)* | <0·001 | <0·001 | 0·30 |
| + BP≤140/90 mmHg                | 156(52)   | 113(53)     | 43(49)   | 161(47)      | 77(45)      | 84(49)   | 0·15   | 0·09   | 0·90 |
| SBP, mmHg                       | 140 ±17   | 140±17      | 140±17   | 143±18       | 142±17      | 144±20   | 0·05   | 0·30   | 0·11 |
| DBP, mmHg                       | 76 ±10    | 77±10       | 76±10    | 75 ±10       | 75±10       | 74±10    | 0·04   | 0·18   | 0·20 |

**Table S2. Associations between blood pressure measures and incident stroke in men**

**without baseline diabetes.** Participants are men not in receipt of baseline anti-hypertensive medication. Data are odds ratios (OR) for a 1SD increase in BP measure unless otherwise stated, \*p<0·05, †p<0·01, ‡p<0·001, §p for ethnicity x BP interaction. ||Cardiovascular disease (CVD) risk factors comprise: smoking, WHR, total/ HDL- cholesterol ratio, diabetes, fasting glucose, physical activity and heart rate. SBP=systolic blood pressure, DBP=diastolic blood pressure, MAP= mean arterial blood pressure PP=pulse pressure.

| BP measure | Model factors          | Europeans |            | South Asians |            |        |
|------------|------------------------|-----------|------------|--------------|------------|--------|
|            |                        | OR        | 95% CI     | OR           | 95% CI     | p§     |
| SBP        | Age                    | 1·25      | 1·01,1·53* | 1·72         | 1·34,2·20‡ | 0·08   |
|            | Age + CVD risk factors | 1·28      | 1·03,1·61* | 1·66         | 1·25,2·19‡ | 0·13   |
| DBP        | Age                    | 0·91      | 0·73,1·13  | 1·95         | 1·50,2·54‡ | <0·001 |
|            | Age + CVD risk factors | 0·90      | 0·71,1·15  | 1·85         | 1·37,2·50‡ | <0·001 |
| MAP        | Age                    | 1·05      | 0·85,1·30  | 1·89         | 1·47,2·43‡ | 0·001  |
|            | Age + CVD risk factors | 1·07      | 0·84,1·35  | 1·81         | 1·36,2·42‡ | 0·001  |
| PP         | Age                    | 1·47      | 1·20,1·81‡ | 1·28         | 0·97,1·70  | 0·35   |
|            | Age + CVD risk factors | 1·49      | 1·20,1·85‡ | 1·27         | 0·94,1·73  | 0·28   |

**Table S3. Associations between blood pressure and incident stroke, accounting for time-varying effects of diabetes diagnosis, by ethnicity.** Participants are men not in receipt of baseline anti-hypertensive medication. Data are odds ratios (OR) for a 1SD increase in BP measure, \*p<0·05, †p<0·01, ‡p<0·001, §p for ethnicity x BP interaction. The time-varying covariate for diabetes diagnosis was categorised as follows: no diabetes ever, diabetes diagnosed after 2009, diabetes diagnosed between 1999 and 2008, diabetes diagnosed between 1988 and 1998, baseline diabetes. SBP=systolic blood pressure, DBP=diastolic blood pressure, MAP= mean arterial blood pressure PP=pulse pressure.

| BP measure | Model factors                 | Europeans |             | South Asians |             | p§     |
|------------|-------------------------------|-----------|-------------|--------------|-------------|--------|
|            |                               | OR        | 95% CI      | OR           | 95% CI      |        |
| SBP        | Age                           | 1·21      | 1·00,1·47*  | 1·63         | 1·34,1·97‡  | 0·04   |
|            | Age + diabetes (time-varying) | 1·22      | 0·98,1·52   | 1·46         | 1·16,1·85†  | 0·10   |
| DBP        | Age                           | 0·91      | 0·74, 1·13  | 1·64         | 1·33,2·03‡  | <0·001 |
|            | Age + diabetes (time-varying) | 0·95      | 0·76, 1·19  | 1·57         | 1·21,2·03‡  | 0·004  |
| MAP        | Age                           | 1·04      | 0·85, 1·28  | 1·69         | 1·38, 2·08‡ | 0·001  |
|            | Age + diabetes (time-varying) | 1·07      | 0·86,1·34   | 1·59         | 1·38,2·03‡  | 0·009  |
| PP         | Age                           | 1·39      | 1·15, 1·68† | 1·35         | 1·10, 1·64† | 0·73   |
|            | Age + diabetes (time-varying) | 1·37      | 1·11,1·68†  | 1·18         | 0·94,1·48   | 0·92   |

**Table S4. Associations between blood pressure and incident stroke, by age group.**

**Excludes participants with baseline stroke or receipt of anti-hypertensive medication.**

Data are odds ratios (OR) for a 1SD increase in BP measure unless stated, \*p<0.05, †p<0.01,

‡p<0.001, §p for age group x BP interaction, ||p for ethnicity x BP interaction. ¶CVD risk

factors comprise: smoking, WHR, total/ HDL- cholesterol ratio, diabetes, fasting glucose,

physical activity, heart rate. SBP=systolic blood pressure, DBP=diastolic blood pressure,

MAP= mean arterial blood pressure PP=pulse pressure.

| BP measure                                                             | Model factors       | Europeans |            |       | South Asians |            |       |      |
|------------------------------------------------------------------------|---------------------|-----------|------------|-------|--------------|------------|-------|------|
|                                                                        |                     | OR        | 95% CI     | p§    | OR           | 95% CI     | p     | p§   |
| <i>a) &lt;55 year, events/N: Europeans 46/823, South Asians 59/768</i> |                     |           |            |       |              |            |       |      |
| SBP                                                                    | Age                 | 1.02      | 0.72,1.43  | 0.25  | 1.74         | 1.34,2.27‡ | 0.02  | 0.36 |
|                                                                        | + CVD risk factors¶ | 1.04      | 0.71,1.53  | 0.54  | 1.58         | 1.16,2.16† | 0.03  | 0.49 |
| DBP                                                                    | Age                 | 0.99      | 0.73,1.34  | 0.42  | 1.74         | 1.33,2.28‡ | 0.006 | 0.43 |
|                                                                        | + CVD risk factors¶ | 1.05      | 0.75,1.47  | 0.19  | 1.60         | 1.16,2.21† | 0.02  | 0.80 |
| MAP                                                                    | Age                 | 1.00      | 0.73,1.36  | 0.80  | 1.79         | 1.38,2.33‡ | 0.005 | 0.44 |
|                                                                        | + CVD risk factors¶ | 1.05      | 0.74,1.49  | 0.73  | 1.65         | 1.21,2.27† | 0.01  | 0.66 |
| PP                                                                     | Age                 | 1.04      | 0.71,1.52  | 0.10  | 1.37         | 1.04,1.80* | 0.27  | 0.74 |
|                                                                        | + CVD risk factors¶ | 1.00      | 0.66, 1.52 | 0.12  | 1.27         | 0.93,1.73  | 0.21  | 0.68 |
| SBP                                                                    | Age                 | 1.07      | 0.63,1.78  | 0.08  | 1.40         | 0.94,2.08  | 0.44  | 0.59 |
| DBP                                                                    | Age                 | 0.95      | 0.61,1.51  | 0.008 | 1.35         | 0.91,2.01  | 0.24  | 0.84 |
| SBP                                                                    | + CVD risk factors¶ | 1.00      | 0.56,1.77  | 0.15  | 1.32         | 0.86,2.03  | 0.34  | 0.69 |
| DBP                                                                    | + CVD risk factors¶ | 1.05      | 0.63,1.73  | 0.09  | 1.31         | 0.84,2.04  | 0.42  | 0.90 |
| MAP                                                                    | Age                 | 0.99      | 0.71,1.37  | 0.65  | 1.76         | 1.31,2.36* | 0.01  | 0.47 |
| PP                                                                     | Age                 | 1.05      | 0.71,1.37  | 0.49  | 1.05         | 0.76,1.45  | 0.96  | 0.73 |
| MAP                                                                    | + CVD risk factors¶ | 1.05      | 0.73,1.53  | 0.34  | 1.63         | 1.15,2.31† | 0.03  | 0.85 |
| PP                                                                     | + CVD risk factors¶ | 0.98      | 0.64,1.52  | 0.47  | 1.03         | 0.73,1.46  | 0.83  | 0.51 |
| <i>b) ≥55 years, events /N: Europeans 58/553, South Asians 43/306</i>  |                     |           |            |       |              |            |       |      |
| SBP                                                                    | Age                 | 1.34      | 1.05,1.70* | -     | 1.48         | 1.10,1.98† | 0.62  | -    |
|                                                                        | + CVD risk factors¶ | 1.33      | 1.02,1.74* | -     | 1.56         | 1.11,2.21† | 0.40  | -    |
| DBP                                                                    | Age                 | 0.84      | 0.63,1.12  | -     | 1.44         | 1.02,2.04* | 0.02  | -    |
|                                                                        | + CVD risk factors¶ | 0.78      | 0.56,1.08  | -     | 1.87         | 1.22,2.87† | 0.004 | -    |
| MAP                                                                    | Age                 | 1.07      | 0.82,1.40  | -     | 1.52         | 1.10,2.10* | 0.10  | -    |
|                                                                        | + CVD risk factors¶ | 1.13      | 0.58,2.23  | -     | 1.81         | 1.22,2.68† | 0.03  | -    |

|     |                     |      |            |   |      |            |       |   |
|-----|---------------------|------|------------|---|------|------------|-------|---|
| PP  | Age                 | 1.58 | 1.26,1.99‡ | - | 1.33 | 1.00,1.77* | 0.36  | - |
|     | + CVD risk factors¶ | 1.63 | 1.27,2.11‡ | - | 1.24 | 0.89,1.73  | 0.42  | - |
| SBP | Age                 | 1.94 | 1.41,2.67‡ | - | 1.39 | 0.94,2.07  | 0.23  | - |
| DBP | Age                 | 0.51 | 0.36,0.75† | - | 1.11 | 0.69,1.77  | 0.01  | - |
| SBP | + CVD risk factors¶ | 2.03 | 1.42,2.93‡ | - | 1.21 | 0.77,1.92  | 0.24  | - |
| DBP | + CVD risk factors¶ | 0.47 | 0.31,0.72‡ | - | 1.61 | 0.92,2.81  | 0.005 | - |
| MAP | Age                 | 0.77 | 0.56,1.80  | - | 1.41 | 0.96,2.07  | 0.02  | - |
| PP  | Age                 | 1.76 | 1.35,2.31‡ | - | 1.13 | 0.81,1.58  | 0.05  | - |
| MAP | + CVD risk factors¶ | 0.75 | 0.51,1.03  | - | 1.92 | 1.20,3.07† | 0.005 | - |
| PP  | + CVD risk factors¶ | 1.87 | 1.39,2.54‡ | - | 0.92 | 0.62,1.36  | 0.03  | - |
